# Supplementary material for: The association between continual, year-round hunting and bellowing rate of bison bulls during the rut
Source: PeerJ. 2017 Apr 6;5:e3153. doi: 10.7717/peerj.3153 (PMC5385126; doi:10.7717/peerj.3153)
Supplement: Data S1 — Data of bellowing frequency and possible variables that influence bellowing frequency. [file peerj-05-3153-s001.xlsx]

## Sheet: Bellows Data with Day 20140222
Bellows	mean_bull_age	mean_cow_age	Max_Bull_Age	attendantmales	Meangroupsize	mean_cow_WT	bullcowratio	TotalSpringPrecip	Date	day	Hunting	ID	sqrt_meanbullage	sqrt_attendantmales	sqrt_Meangroupsize	sqrt_bullcowratio	sqrt_Bellows	filter_$	sqrt_day	site	# Cows in Group
0	7.1	7.95	17.5	2	170	1074	0.101626	10.6	2013-07-01	1	0	BNP	2.66458	1.41421	13.0384	0.318788	0	1	1	1	10
0	7.1	7.95	17.5	0	170	1074	0.101626	10.6	2013-07-01	1	0	BNP	2.66458	0	13.0384	0.318788	0	1	1	1	10
0	7.1	7.95	17.5	7	170	1074	0.101626	10.6	2013-07-01	1	0	BNP	2.66458	2.64575	13.0384	0.318788	0	1	1	1	10
7	7.1	7.95	17.5	0	22	1074	0.101626	10.6	2013-07-06	6	0	BNP	2.66458	0	4.69042	0.318788	2.64575	1	2.44949	1	0
5	7.1	7.95	17.5	1	25	1074	0.101626	10.6	2013-07-06	6	0	BNP	2.66458	1	5	0.318788	2.23607	1	2.44949	1	0
68	7.1	7.95	17.5	3	31	1074	0.101626	10.6	2013-07-07	7	0	BNP	2.66458	1.73205	5.56776	0.318788	8.24621	1	2.64575	1	11
6	7.1	7.95	17.5	3	31	1074	0.101626	10.6	2013-07-07	7	0	BNP	2.66458	1.73205	5.56776	0.318788	2.44949	1	2.64575	1	11
3	7.1	7.95	17.5	3	31	1074	0.101626	10.6	2013-07-07	7	0	BNP	2.66458	1.73205	5.56776	0.318788	1.73205	1	2.64575	1	11
0	7.1	7.95	17.5	3	31	1074	0.101626	10.6	2013-07-07	7	0	BNP	2.66458	1.73205	5.56776	0.318788	0	1	2.64575	1	9
0	7.1	7.95	17.5	0	31	1074	0.101626	10.6	2013-07-07	7	0	BNP	2.66458	0	5.56776	0.318788	0	1	2.64575	1	9
0	7.1	7.95	17.5	3	27	1074	0.101626	10.6	2013-07-07	7	0	BNP	2.66458	1.73205	5.19615	0.318788	0	1	2.64575	1	9
0	7.1	7.95	17.5	3	27	1074	0.101626	10.6	2013-07-07	7	0	BNP	2.66458	1.73205	5.19615	0.318788	0	1	2.64575	1	9
0	7.1	7.95	17.5	1	29	1074	0.101626	10.6	2013-07-07	7	0	BNP	2.66458	1	5.38516	0.318788	0	1	2.64575	1	9
163	7.1	7.95	17.5	3	350	1074	0.101626	10.6	2013-07-10	10	0	BNP	2.66458	1.73205	18.7083	0.318788	12.7671	1	3.16228	1	151
152	7.1	7.95	17.5	1	350	1074	0.101626	10.6	2013-07-10	10	0	BNP	2.66458	1	18.7083	0.318788	12.3288	1	3.16228	1	151
149	7.1	7.95	17.5	2	350	1074	0.101626	10.6	2013-07-10	10	0	BNP	2.66458	1.41421	18.7083	0.318788	12.2066	1	3.16228	1	151
126	7.1	7.95	17.5	2	350	1074	0.101626	10.6	2013-07-10	10	0	BNP	2.66458	1.41421	18.7083	0.318788	11.225	1	3.16228	1	151
111	7.1	7.95	17.5	2	350	1074	0.101626	10.6	2013-07-10	10	0	BNP	2.66458	1.41421	18.7083	0.318788	10.5357	1	3.16228	1	151
38	7.1	7.95	17.5	0	350	1074	0.101626	10.6	2013-07-10	10	0	BNP	2.66458	0	18.7083	0.318788	6.16441	1	3.16228	1	151
12	7.1	7.95	17.5	3	350	1074	0.101626	10.6	2013-07-10	10	0	BNP	2.66458	1.73205	18.7083	0.318788	3.4641	1	3.16228	1	151
0	7.1	7.95	17.5	2	350	1074	0.101626	10.6	2013-07-10	10	0	BNP	2.66458	1.41421	18.7083	0.318788	0	1	3.16228	1	151
0	7.1	7.95	17.5	1	350	1074	0.101626	10.6	2013-07-10	10	0	BNP	2.66458	1	18.7083	0.318788	0	1	3.16228	1	151
78	7.1	7.95	17.5	0	200	1074	0.101626	10.6	2013-07-12	12	0	BNP	2.66458	0	14.1421	0.318788	8.83176	1	3.4641	1	39
72	7.1	7.95	17.5	2	200	1074	0.101626	10.6	2013-07-12	12	0	BNP	2.66458	1.41421	14.1421	0.318788	8.48528	1	3.4641	1	39
20	7.1	7.95	17.5	0	200	1074	0.101626	10.6	2013-07-12	12	0	BNP	2.66458	0	14.1421	0.318788	4.47214	1	3.4641	1	39
0	7.1	7.95	17.5	1	70	1074	0.101626	10.6	2013-07-12	12	0	BNP	2.66458	1	8.3666	0.318788	0	1	3.4641	1	30
0	7.1	7.95	17.5	0	70	1074	0.101626	10.6	2013-07-12	12	0	BNP	2.66458	0	8.3666	0.318788	0	1	3.4641	1	30
0	7.1	7.95	17.5	0	200	1074	0.101626	10.6	2013-07-12	12	0	BNP	2.66458	0	14.1421	0.318788	0	1	3.4641	1	39
150	7.1	7.95	17.5	1	2	1074	0.101626	10.6	2013-07-13	13	0	BNP	2.66458	1	1.41421	0.318788	12.2474	1	3.60555	1	3
131	7.1	7.95	17.5	3	2	1074	0.101626	10.6	2013-07-13	13	0	BNP	2.66458	1.73205	1.41421	0.318788	11.4455	1	3.60555	1	3
100	7.1	7.95	17.5	0	300	1074	0.101626	10.6	2013-07-13	13	0	BNP	2.66458	0	17.3205	0.318788	10	1	3.60555	1	2
97	7.1	7.95	17.5	0	2	1074	0.101626	10.6	2013-07-13	13	0	BNP	2.66458	0	1.41421	0.318788	9.84886	1	3.60555	1	2
68	7.1	7.95	17.5	1	300	1074	0.101626	10.6	2013-07-13	13	0	BNP	2.66458	1	17.3205	0.318788	8.24621	1	3.60555	1	1
66	7.1	7.95	17.5	1	2	1074	0.101626	10.6	2013-07-13	13	0	BNP	2.66458	1	1.41421	0.318788	8.12404	1	3.60555	1	1
50	7.1	7.95	17.5	0	2	1074	0.101626	10.6	2013-07-13	13	0	BNP	2.66458	0	1.41421	0.318788	7.07107	1	3.60555	1	2
35	7.1	7.95	17.5	1	2	1074	0.101626	10.6	2013-07-13	13	0	BNP	2.66458	1	1.41421	0.318788	5.91608	1	3.60555	1	2
15	7.1	7.95	17.5	1	2	1074	0.101626	10.6	2013-07-13	13	0	BNP	2.66458	1	1.41421	0.318788	3.87298	1	3.60555	1	1
13	7.1	7.95	17.5	1	300	1074	0.101626	10.6	2013-07-13	13	0	BNP	2.66458	1	17.3205	0.318788	3.60555	1	3.60555	1	1
11	7.1	7.95	17.5	3	2	1074	0.101626	10.6	2013-07-13	13	0	BNP	2.66458	1.73205	1.41421	0.318788	3.31662	1	3.60555	1	1
10	7.1	7.95	17.5	0	300	1074	0.101626	10.6	2013-07-13	13	0	BNP	2.66458	0	17.3205	0.318788	3.16228	1	3.60555	1	3
7	7.1	7.95	17.5	0	300	1074	0.101626	10.6	2013-07-13	13	0	BNP	2.66458	0	17.3205	0.318788	2.64575	1	3.60555	1	3
0	7.1	7.95	17.5	1	2	1074	0.101626	10.6	2013-07-13	13	0	BNP	2.66458	1	1.41421	0.318788	0	1	3.60555	1	3
118	7.1	7.95	17.5	1	300	1074	0.101626	10.6	2013-07-14	14	0	BNP	2.66458	1	17.3205	0.318788	10.8628	1	3.74166	1	3
109	7.1	7.95	17.5	0	300	1074	0.101626	10.6	2013-07-14	14	0	BNP	2.66458	0	17.3205	0.318788	10.4403	1	3.74166	1	1
50	7.1	7.95	17.5	0	300	1074	0.101626	10.6	2013-07-14	14	0	BNP	2.66458	0	17.3205	0.318788	7.07107	1	3.74166	1	1
50	7.1	7.95	17.5	1	300	1074	0.101626	10.6	2013-07-14	14	0	BNP	2.66458	1	17.3205	0.318788	7.07107	1	3.74166	1	3
30	7.1	7.95	17.5	1	300	1074	0.101626	10.6	2013-07-14	14	0	BNP	2.66458	1	17.3205	0.318788	5.47723	1	3.74166	1	3
23	7.1	7.95	17.5	1	300	1074	0.101626	10.6	2013-07-14	14	0	BNP	2.66458	1	17.3205	0.318788	4.79583	1	3.74166	1	3
4	7.1	7.95	17.5	0	300	1074	0.101626	10.6	2013-07-14	14	0	BNP	2.66458	0	17.3205	0.318788	2	1	3.74166	1	1
89	7.1	7.95	17.5	3	134	1074	0.101626	10.6	2013-07-15	15	0	BNP	2.66458	1.73205	11.5758	0.318788	9.43398	1	3.87298	1	8
75	7.1	7.95	17.5	5	300	1074	0.101626	10.6	2013-07-15	15	0	BNP	2.66458	2.23607	17.3205	0.318788	8.66025	1	3.87298	1	45
70	7.1	7.95	17.5	3	300	1074	0.101626	10.6	2013-07-15	15	0	BNP	2.66458	1.73205	17.3205	0.318788	8.3666	1	3.87298	1	45
44	7.1	7.95	17.5	3	300	1074	0.101626	10.6	2013-07-15	15	0	BNP	2.66458	1.73205	17.3205	0.318788	6.63325	1	3.87298	1	45
14	7.1	7.95	17.5	0	300	1074	0.101626	10.6	2013-07-15	15	0	BNP	2.66458	0	17.3205	0.318788	3.74166	1	3.87298	1	45
146	7.1	7.95	17.5	18	250	1074	0.101626	10.6	2013-07-16	16	0	BNP	2.66458	4.24264	15.8114	0.318788	12.083	1	4	1	63
80	7.1	7.95	17.5	0	134	1074	0.101626	10.6	2013-07-16	16	0	BNP	2.66458	0	11.5758	0.318788	8.94427	1	4	1	63
49	7.1	7.95	17.5	3	134	1074	0.101626	10.6	2013-07-16	16	0	BNP	2.66458	1.73205	11.5758	0.318788	7	1	4	1	63
2	8	7.86	9	4	60	991	0.0849673	10.4	2013-07-16	16	1	YB	2.82843	2	7.74597	0.291492	1.41421	0	4	#NULL!	15
0	8	7.86	9	3	60	991	0.0849673	10.4	2013-07-16	16	1	YB	2.82843	1.73205	7.74597	0.291492	0	0	4	#NULL!	15
0	8	7.86	9	0	60	991	0.0849673	10.4	2013-07-16	16	1	YB	2.82843	0	7.74597	0.291492	0	0	4	#NULL!	15
0	8	7.86	9	0	60	991	0.0849673	10.4	2013-07-16	16	1	YB	2.82843	0	7.74597	0.291492	0	0	4	#NULL!	15
0	8	7.86	9	0	60	991	0.0849673	10.4	2013-07-16	16	1	YB	2.82843	0	7.74597	0.291492	0	0	4	#NULL!	15
0	8	7.86	9	4	50	991	0.0849673	10.4	2013-07-16	16	1	YB	2.82843	2	7.07107	0.291492	0	0	4	#NULL!	15
3	5	4.45	6	4	160	938	0.0294118	4.28	2013-07-17	17	1	SB	2.23607	2	12.6491	0.171499	1.73205	0	4.12311	2	70
1	5	4.45	6	4	160	938	0.0294118	4.28	2013-07-17	17	1	SB	2.23607	2	12.6491	0.171499	1	0	4.12311	2	70
0	5	4.45	6	4	70	938	0.0294118	4.28	2013-07-17	17	1	SB	2.23607	2	8.3666	0.171499	0	0	4.12311	2	20
0	5	4.45	6	4	70	938	0.0294118	4.28	2013-07-17	17	1	SB	2.23607	2	8.3666	0.171499	0	0	4.12311	2	20
0	5	4.45	6	4	70	938	0.0294118	4.28	2013-07-17	17	1	SB	2.23607	2	8.3666	0.171499	0	0	4.12311	2	20
0	5	4.45	6	4	70	938	0.0294118	4.28	2013-07-17	17	1	SB	2.23607	2	8.3666	0.171499	0	0	4.12311	2	20
0	5	4.45	6	4	193	938	0.0294118	4.28	2013-07-17	17	1	SB	2.23607	2	13.8924	0.171499	0	0	4.12311	2	73
0	5	4.45	6	1	24	938	0.0294118	4.28	2013-07-17	17	1	SB	2.23607	1	4.89898	0.171499	0	0	4.12311	2	10
0	5	4.45	6	2	29	938	0.0294118	4.28	2013-07-17	17	1	SB	2.23607	1.41421	5.38516	0.171499	0	0	4.12311	2	14
0	5	4.45	6	6	200	938	0.0294118	4.28	2013-07-18	18	1	SB	2.23607	2.44949	14.1421	0.171499	0	0	4.24264	2	77
0	5	4.45	6	6	200	938	0.0294118	4.28	2013-07-18	18	1	SB	2.23607	2.44949	14.1421	0.171499	0	0	4.24264	2	77
7	8	7.86	9	5	150	991	0.0849673	10.4	2013-07-19	19	1	YB	2.82843	2.23607	12.2474	0.291492	2.64575	0	4.3589	#NULL!	43
0	8	7.86	9	1	30	991	0.0849673	10.4	2013-07-19	19	1	YB	2.82843	1	5.47723	0.291492	0	0	4.3589	#NULL!	13
0	8	7.86	9	1	30	991	0.0849673	10.4	2013-07-19	19	1	YB	2.82843	1	5.47723	0.291492	0	0	4.3589	#NULL!	13
0	8	7.86	9	4	150	991	0.0849673	10.4	2013-07-19	19	1	YB	2.82843	2	12.2474	0.291492	0	0	4.3589	#NULL!	43
0	8	7.86	9	5	150	991	0.0849673	10.4	2013-07-19	19	1	YB	2.82843	2.23607	12.2474	0.291492	0	0	4.3589	#NULL!	43
0	8	7.86	9	3	150	991	0.0849673	10.4	2013-07-19	19	1	YB	2.82843	1.73205	12.2474	0.291492	0	0	4.3589	#NULL!	43
0	8	7.86	9	2	75	991	0.0849673	10.4	2013-07-19	19	1	YB	2.82843	1.41421	8.66025	0.291492	0	0	4.3589	#NULL!	22
0	8	7.86	9	1	48	991	0.0849673	10.4	2013-07-21	21	1	YB	2.82843	1	6.9282	0.291492	0	0	4.58258	#NULL!	30
0	8	7.86	9	1	11	991	0.0849673	10.4	2013-07-21	21	1	YB	2.82843	1	3.31662	0.291492	0	0	4.58258	#NULL!	10
0	8	7.86	9	2	7	991	0.0849673	10.4	2013-07-21	21	1	YB	2.82843	1.41421	2.64575	0.291492	0	0	4.58258	#NULL!	3
0	8	7.86	9	2	7	991	0.0849673	10.4	2013-07-21	21	1	YB	2.82843	1.41421	2.64575	0.291492	0	0	4.58258	#NULL!	3
0	8	7.86	9	2	12	991	0.0849673	10.4	2013-07-21	21	1	YB	2.82843	1.41421	3.4641	0.291492	0	0	4.58258	#NULL!	10
0	8	7.86	9	2	12	991	0.0849673	10.4	2013-07-21	21	1	YB	2.82843	1.41421	3.4641	0.291492	0	0	4.58258	#NULL!	10
0	8	7.86	9	3	82	991	0.0849673	10.4	2013-07-21	21	1	YB	2.82843	1.73205	9.05539	0.291492	0	0	4.58258	#NULL!	35
0	8	7.86	9	3	82	991	0.0849673	10.4	2013-07-21	21	1	YB	2.82843	1.73205	9.05539	0.291492	0	0	4.58258	#NULL!	35
6	5	4.45	6	7	200	938	0.0294118	4.28	2013-07-22	22	1	SB	2.23607	2.64575	14.1421	0.171499	2.44949	0	4.69042	2	60
5	5	4.45	6	7	200	938	0.0294118	4.28	2013-07-22	22	1	SB	2.23607	2.64575	14.1421	0.171499	2.23607	0	4.69042	2	60
3	5	4.45	6	7	200	938	0.0294118	4.28	2013-07-22	22	1	SB	2.23607	2.64575	14.1421	0.171499	1.73205	0	4.69042	2	60
1	5	4.45	6	7	200	938	0.0294118	4.28	2013-07-22	22	1	SB	2.23607	2.64575	14.1421	0.171499	1	0	4.69042	2	60
1	5	4.45	6	7	200	938	0.0294118	4.28	2013-07-22	22	1	SB	2.23607	2.64575	14.1421	0.171499	1	0	4.69042	2	60
0	5	4.45	6	6	200	938	0.0294118	4.28	2013-07-22	22	1	SB	2.23607	2.44949	14.1421	0.171499	0	0	4.69042	2	60
0	5	4.45	6	6	200	938	0.0294118	4.28	2013-07-22	22	1	SB	2.23607	2.44949	14.1421	0.171499	0	0	4.69042	2	60
0	5	4.45	6	6	200	938	0.0294118	4.28	2013-07-22	22	1	SB	2.23607	2.44949	14.1421	0.171499	0	0	4.69042	2	60
0	5	4.45	6	6	200	938	0.0294118	4.28	2013-07-22	22	1	SB	2.23607	2.44949	14.1421	0.171499	0	0	4.69042	2	60
0	5	4.45	6	7	200	938	0.0294118	4.28	2013-07-22	22	1	SB	2.23607	2.64575	14.1421	0.171499	0	0	4.69042	2	60
0	5	4.45	6	7	200	938	0.0294118	4.28	2013-07-22	22	1	SB	2.23607	2.64575	14.1421	0.171499	0	0	4.69042	2	60
0	5	4.45	6	7	200	938	0.0294118	4.28	2013-07-22	22	1	SB	2.23607	2.64575	14.1421	0.171499	0	0	4.69042	2	60
0	5	4.45	6	7	200	938	0.0294118	4.28	2013-07-22	22	1	SB	2.23607	2.64575	14.1421	0.171499	0	0	4.69042	2	60
0	5	4.45	6	7	200	938	0.0294118	4.28	2013-07-22	22	1	SB	2.23607	2.64575	14.1421	0.171499	0	0	4.69042	2	60
0	5	4.45	6	7	200	938	0.0294118	4.28	2013-07-22	22	1	SB	2.23607	2.64575	14.1421	0.171499	0	0	4.69042	2	60
0	5	4.45	6	7	200	938	0.0294118	4.28	2013-07-22	22	1	SB	2.23607	2.64575	14.1421	0.171499	0	0	4.69042	2	60
4	8	7.86	9	3	80	991	0.0849673	10.4	2013-07-23	23	1	YB	2.82843	1.73205	8.94427	0.291492	2	0	4.79583	#NULL!	33
1	8	7.86	9	3	80	991	0.0849673	10.4	2013-07-23	23	1	YB	2.82843	1.73205	8.94427	0.291492	1	0	4.79583	#NULL!	33
0	8	7.86	9	3	80	991	0.0849673	10.4	2013-07-23	23	1	YB	2.82843	1.73205	8.94427	0.291492	0	0	4.79583	#NULL!	33
0	8	7.86	9	3	80	991	0.0849673	10.4	2013-07-23	23	1	YB	2.82843	1.73205	8.94427	0.291492	0	0	4.79583	#NULL!	33
0	8	7.86	9	3	80	991	0.0849673	10.4	2013-07-23	23	1	YB	2.82843	1.73205	8.94427	0.291492	0	0	4.79583	#NULL!	33
0	8	7.86	9	3	80	991	0.0849673	10.4	2013-07-23	23	1	YB	2.82843	1.73205	8.94427	0.291492	0	0	4.79583	#NULL!	33
0	8	7.86	9	3	80	991	0.0849673	10.4	2013-07-23	23	1	YB	2.82843	1.73205	8.94427	0.291492	0	0	4.79583	#NULL!	33
0	8	7.86	9	3	80	991	0.0849673	10.4	2013-07-23	23	1	YB	2.82843	1.73205	8.94427	0.291492	0	0	4.79583	#NULL!	33
0	8	7.86	9	3	80	991	0.0849673	10.4	2013-07-23	23	1	YB	2.82843	1.73205	8.94427	0.291492	0	0	4.79583	#NULL!	33
0	8	7.86	9	3	80	991	0.0849673	10.4	2013-07-23	23	1	YB	2.82843	1.73205	8.94427	0.291492	0	0	4.79583	#NULL!	33
0	8	7.86	9	3	80	991	0.0849673	10.4	2013-07-23	23	1	YB	2.82843	1.73205	8.94427	0.291492	0	0	4.79583	#NULL!	33
0	8	7.86	9	3	80	991	0.0849673	10.4	2013-07-23	23	1	YB	2.82843	1.73205	8.94427	0.291492	0	0	4.79583	#NULL!	33
0	8	7.86	9	3	80	991	0.0849673	10.4	2013-07-23	23	1	YB	2.82843	1.73205	8.94427	0.291492	0	0	4.79583	#NULL!	33
0	8	7.86	9	3	80	991	0.0849673	10.4	2013-07-23	23	1	YB	2.82843	1.73205	8.94427	0.291492	0	0	4.79583	#NULL!	33
5	8	7.86	9	2	20	991	0.0849673	10.4	2013-07-24	24	1	YB	2.82843	1.41421	4.47214	0.291492	2.23607	0	4.89898	#NULL!	11
2	8	7.86	9	2	20	991	0.0849673	10.4	2013-07-24	24	1	YB	2.82843	1.41421	4.47214	0.291492	1.41421	0	4.89898	#NULL!	11
0	8	7.86	9	6	55	991	0.0849673	10.4	2013-07-24	24	1	YB	2.82843	2.44949	7.4162	0.291492	0	0	4.89898	#NULL!	21
0	8	7.86	9	6	55	991	0.0849673	10.4	2013-07-24	24	1	YB	2.82843	2.44949	7.4162	0.291492	0	0	4.89898	#NULL!	21
0	8	7.86	9	3	30	991	0.0849673	10.4	2013-07-24	24	1	YB	2.82843	1.73205	5.47723	0.291492	0	0	4.89898	#NULL!	12
0	8	7.86	9	3	30	991	0.0849673	10.4	2013-07-24	24	1	YB	2.82843	1.73205	5.47723	0.291492	0	0	4.89898	#NULL!	12
0	8	7.86	9	3	30	991	0.0849673	10.4	2013-07-24	24	1	YB	2.82843	1.73205	5.47723	0.291492	0	0	4.89898	#NULL!	12
0	8	7.86	9	5	150	991	0.0849673	10.4	2013-07-24	24	1	YB	2.82843	2.23607	12.2474	0.291492	0	0	4.89898	#NULL!	47
0	8	7.86	9	5	150	991	0.0849673	10.4	2013-07-24	24	1	YB	2.82843	2.23607	12.2474	0.291492	0	0	4.89898	#NULL!	47
0	8	7.86	9	5	150	991	0.0849673	10.4	2013-07-24	24	1	YB	2.82843	2.23607	12.2474	0.291492	0	0	4.89898	#NULL!	47
0	8	7.86	9	5	150	991	0.0849673	10.4	2013-07-24	24	1	YB	2.82843	2.23607	12.2474	0.291492	0	0	4.89898	#NULL!	47
0	8	7.86	9	5	150	991	0.0849673	10.4	2013-07-24	24	1	YB	2.82843	2.23607	12.2474	0.291492	0	0	4.89898	#NULL!	47
0	8	7.86	9	5	150	991	0.0849673	10.4	2013-07-24	24	1	YB	2.82843	2.23607	12.2474	0.291492	0	0	4.89898	#NULL!	47
0	8	7.86	9	5	150	991	0.0849673	10.4	2013-07-24	24	1	YB	2.82843	2.23607	12.2474	0.291492	0	0	4.89898	#NULL!	47
0	8	7.86	9	5	150	991	0.0849673	10.4	2013-07-24	24	1	YB	2.82843	2.23607	12.2474	0.291492	0	0	4.89898	#NULL!	47
0	8	7.86	9	5	150	991	0.0849673	10.4	2013-07-24	24	1	YB	2.82843	2.23607	12.2474	0.291492	0	0	4.89898	#NULL!	47
0	8	7.86	9	5	150	991	0.0849673	10.4	2013-07-24	24	1	YB	2.82843	2.23607	12.2474	0.291492	0	0	4.89898	#NULL!	47
0	5	4.45	6	4	54	938	0.0294118	4.28	2013-07-25	25	1	SB	2.23607	2	7.34847	0.171499	0	0	5	2	23
0	5	4.45	6	4	54	938	0.0294118	4.28	2013-07-25	25	1	SB	2.23607	2	7.34847	0.171499	0	0	5	2	23
0	5	4.45	6	4	54	938	0.0294118	4.28	2013-07-25	25	1	SB	2.23607	2	7.34847	0.171499	0	0	5	2	23
0	5	4.45	6	4	54	938	0.0294118	4.28	2013-07-25	25	1	SB	2.23607	2	7.34847	0.171499	0	0	5	2	23
0	5	4.45	6	4	54	938	0.0294118	4.28	2013-07-25	25	1	SB	2.23607	2	7.34847	0.171499	0	0	5	2	23
0	5	4.45	6	4	54	938	0.0294118	4.28	2013-07-25	25	1	SB	2.23607	2	7.34847	0.171499	0	0	5	2	23
0	5	4.45	6	4	54	938	0.0294118	4.28	2013-07-25	25	1	SB	2.23607	2	7.34847	0.171499	0	0	5	2	23
0	5	4.45	6	4	54	938	0.0294118	4.28	2013-07-25	25	1	SB	2.23607	2	7.34847	0.171499	0	0	5	2	23
0	5	4.45	6	4	54	938	0.0294118	4.28	2013-07-25	25	1	SB	2.23607	2	7.34847	0.171499	0	0	5	2	23
340	7.1	7.95	17.5	18	250	1074	0.101626	10.6	2013-07-26	26	0	BNP	2.66458	4.24264	15.8114	0.318788	18.4391	1	5.09902	1	35
100	7.1	7.95	17.5	18	250	1074	0.101626	10.6	2013-07-26	26	0	BNP	2.66458	4.24264	15.8114	0.318788	10	1	5.09902	1	35
68	7.1	7.95	17.5	18	35	1074	0.101626	10.6	2013-07-26	26	0	BNP	2.66458	4.24264	5.91608	0.318788	8.24621	1	5.09902	1	35
72	8	7.86	9	4	100	991	0.0849673	10.4	2013-07-26	26	1	YB	2.82843	2	10	0.291492	8.48528	0	5.09902	#NULL!
54	8	7.86	9	4	25	991	0.0849673	10.4	2013-07-26	26	1	YB	2.82843	2	5	0.291492	7.34847	0	5.09902	#NULL!	8
45	8	7.86	9	6	55	991	0.0849673	10.4	2013-07-26	26	1	YB	2.82843	2.44949	7.4162	0.291492	6.7082	0	5.09902	#NULL!	9
45	8	7.86	9	5	30	991	0.0849673	10.4	2013-07-26	26	1	YB	2.82843	2.23607	5.47723	0.291492	6.7082	0	5.09902	#NULL!	9
15	8	7.86	9	6	55	991	0.0849673	10.4	2013-07-26	26	1	YB	2.82843	2.44949	7.4162	0.291492	3.87298	0	5.09902	#NULL!	30
7	8	7.86	9	5	28	991	0.0849673	10.4	2013-07-26	26	1	YB	2.82843	2.23607	5.2915	0.291492	2.64575	0	5.09902	#NULL!	9
6	8	7.86	9	5	30	991	0.0849673	10.4	2013-07-26	26	1	YB	2.82843	2.23607	5.47723	0.291492	2.44949	0	5.09902	#NULL!	9
2	8	7.86	9	5	28	991	0.0849673	10.4	2013-07-26	26	1	YB	2.82843	2.23607	5.2915	0.291492	1.41421	0	5.09902	#NULL!	8
0	8	7.86	9	6	55	991	0.0849673	10.4	2013-07-26	26	1	YB	2.82843	2.44949	7.4162	0.291492	0	0	5.09902	#NULL!	12
0	8	7.86	9	6	55	991	0.0849673	10.4	2013-07-26	26	1	YB	2.82843	2.44949	7.4162	0.291492	0	0	5.09902	#NULL!	12
0	8	7.86	9	6	55	991	0.0849673	10.4	2013-07-26	26	1	YB	2.82843	2.44949	7.4162	0.291492	0	0	5.09902	#NULL!	12
0	8	7.86	9	6	55	991	0.0849673	10.4	2013-07-26	26	1	YB	2.82843	2.44949	7.4162	0.291492	0	0	5.09902	#NULL!	12
0	8	7.86	9	5	20	991	0.0849673	10.4	2013-07-26	26	1	YB	2.82843	2.23607	4.47214	0.291492	0	0	5.09902	#NULL!	9
0	8	7.86	9	5	175	991	0.0849673	10.4	2013-07-26	26	1	YB	2.82843	2.23607	13.2288	0.291492	0	0	5.09902	#NULL!	60
0	8	7.86	9	5	175	991	0.0849673	10.4	2013-07-26	26	1	YB	2.82843	2.23607	13.2288	0.291492	0	0	5.09902	#NULL!	60
0	8	7.86	9	5	175	991	0.0849673	10.4	2013-07-26	26	1	YB	2.82843	2.23607	13.2288	0.291492	0	0	5.09902	#NULL!	60
0	8	7.86	9	0	175	991	0.0849673	10.4	2013-07-26	26	1	YB	2.82843	0	13.2288	0.291492	0	0	5.09902	#NULL!	60
0	8	7.86	9	0	175	991	0.0849673	10.4	2013-07-26	26	1	YB	2.82843	0	13.2288	0.291492	0	0	5.09902	#NULL!	60
0	8	7.86	9	0	175	991	0.0849673	10.4	2013-07-26	26	1	YB	2.82843	0	13.2288	0.291492	0	0	5.09902	#NULL!	60
0	8	7.86	9	3	60	991	0.0849673	10.4	2013-07-26	26	1	YB	2.82843	1.73205	7.74597	0.291492	0	0	5.09902	#NULL!	25
0	8	7.86	9	3	60	991	0.0849673	10.4	2013-07-26	26	1	YB	2.82843	1.73205	7.74597	0.291492	0	0	5.09902	#NULL!	25
0	8	7.86	9	3	60	991	0.0849673	10.4	2013-07-26	26	1	YB	2.82843	1.73205	7.74597	0.291492	0	0	5.09902	#NULL!	25
0	8	7.86	9	0	25	991	0.0849673	10.4	2013-07-26	26	1	YB	2.82843	0	5	0.291492	0	0	5.09902	#NULL!	10
0	8	7.86	9	2	20	991	0.0849673	10.4	2013-07-26	26	1	YB	2.82843	1.41421	4.47214	0.291492	0	0	5.09902	#NULL!	9
0	8	7.86	9	2	20	991	0.0849673	10.4	2013-07-26	26	1	YB	2.82843	1.41421	4.47214	0.291492	0	0	5.09902	#NULL!	9
0	8	7.86	9	2	20	991	0.0849673	10.4	2013-07-26	26	1	YB	2.82843	1.41421	4.47214	0.291492	0	0	5.09902	#NULL!	9
0	5	4.45	6	4	54	938	0.0294118	4.28	2013-07-27	27	1	SB	2.23607	2	7.34847	0.171499	0	0	5.19615	2	25
0	5	4.45	6	4	54	938	0.0294118	4.28	2013-07-27	27	1	SB	2.23607	2	7.34847	0.171499	0	0	5.19615	2	25
0	5	4.45	6	4	54	938	0.0294118	4.28	2013-07-27	27	1	SB	2.23607	2	7.34847	0.171499	0	0	5.19615	2	25
0	5	4.45	6	4	54	938	0.0294118	4.28	2013-07-27	27	1	SB	2.23607	2	7.34847	0.171499	0	0	5.19615	2	25
0	5	4.45	6	4	54	938	0.0294118	4.28	2013-07-27	27	1	SB	2.23607	2	7.34847	0.171499	0	0	5.19615	2	25
0	5	4.45	6	4	54	938	0.0294118	4.28	2013-07-27	27	1	SB	2.23607	2	7.34847	0.171499	0	0	5.19615	2	25
0	5	4.45	6	4	54	938	0.0294118	4.28	2013-07-27	27	1	SB	2.23607	2	7.34847	0.171499	0	0	5.19615	2	25
0	5	4.45	6	4	54	938	0.0294118	4.28	2013-07-27	27	1	SB	2.23607	2	7.34847	0.171499	0	0	5.19615	2	25
0	5	4.45	6	5	54	938	0.0294118	4.28	2013-07-27	27	1	SB	2.23607	2.23607	7.34847	0.171499	0	0	5.19615	2	25
0	5	4.45	6	5	54	938	0.0294118	4.28	2013-07-27	27	1	SB	2.23607	2.23607	7.34847	0.171499	0	0	5.19615	2	25
0	5	4.45	6	5	54	938	0.0294118	4.28	2013-07-27	27	1	SB	2.23607	2.23607	7.34847	0.171499	0	0	5.19615	2	25
0	5	4.45	6	5	54	938	0.0294118	4.28	2013-07-27	27	1	SB	2.23607	2.23607	7.34847	0.171499	0	0	5.19615	2	25
0	5	4.45	6	5	54	938	0.0294118	4.28	2013-07-27	27	1	SB	2.23607	2.23607	7.34847	0.171499	0	0	5.19615	2	25
0	5	4.45	6	2	39	938	0.0294118	4.28	2013-07-27	27	1	SB	2.23607	1.41421	6.245	0.171499	0	0	5.19615	2	19
0	5	4.45	6	2	29	938	0.0294118	4.28	2013-07-27	27	1	SB	2.23607	1.41421	5.38516	0.171499	0	0	5.19615	2	15
0	5	4.45	6	2	16	938	0.0294118	4.28	2013-07-27	27	1	SB	2.23607	1.41421	4	0.171499	0	0	5.19615	2	15
0	5	4.45	6	4	23	938	0.0294118	4.28	2013-07-27	27	1	SB	2.23607	2	4.79583	0.171499	0	0	5.19615	2	16
0	5	4.45	6	1	24	938	0.0294118	4.28	2013-07-27	27	1	SB	2.23607	1	4.89898	0.171499	0	0	5.19615	2	16
0	5	4.45	6	1	15	938	0.0294118	4.28	2013-07-27	27	1	SB	2.23607	1	3.87298	0.171499	0	0	5.19615	2	8
0	5	4.45	6	5	15	938	0.0294118	4.28	2013-07-27	27	1	SB	2.23607	2.23607	3.87298	0.171499	0	0	5.19615	2	8
0	5	4.45	6	5	27	938	0.0294118	4.28	2013-07-27	27	1	SB	2.23607	2.23607	5.19615	0.171499	0	0	5.19615	2	5
0	5	4.45	6	14	137	938	0.0294118	4.28	2013-07-27	27	1	SB	2.23607	3.74166	11.7047	0.171499	0	0	5.19615	2	63
0	5	4.45	6	23	23	938	0.0294118	4.28	2013-07-27	27	1	SB	2.23607	4.79583	4.79583	0.171499	0	0	5.19615	2	8
100	8	7.86	9	10	160	991	0.0849673	10.4	2013-07-28	28	1	YB	2.82843	3.16228	12.6491	0.291492	10	0	5.2915	#NULL!	47
78	8	7.86	9	10	160	991	0.0849673	10.4	2013-07-28	28	1	YB	2.82843	3.16228	12.6491	0.291492	8.83176	0	5.2915	#NULL!	47
62	8	7.86	9	10	160	991	0.0849673	10.4	2013-07-28	28	1	YB	2.82843	3.16228	12.6491	0.291492	7.87401	0	5.2915	#NULL!	47
50	8	7.86	9	10	160	991	0.0849673	10.4	2013-07-28	28	1	YB	2.82843	3.16228	12.6491	0.291492	7.07107	0	5.2915	#NULL!	47
45	8	7.86	9	10	160	991	0.0849673	10.4	2013-07-28	28	1	YB	2.82843	3.16228	12.6491	0.291492	6.7082	0	5.2915	#NULL!	47
15	8	7.86	9	10	160	991	0.0849673	10.4	2013-07-28	28	1	YB	2.82843	3.16228	12.6491	0.291492	3.87298	0	5.2915	#NULL!	47
3	8	7.86	9	2	4	991	0.0849673	10.4	2013-07-28	28	1	YB	2.82843	1.41421	2	0.291492	1.73205	0	5.2915	#NULL!	2
0	8	7.86	9	2	4	991	0.0849673	10.4	2013-07-28	28	1	YB	2.82843	1.41421	2	0.291492	0	0	5.2915	#NULL!	2
0	8	7.86	9	2	4	991	0.0849673	10.4	2013-07-28	28	1	YB	2.82843	1.41421	2	0.291492	0	0	5.2915	#NULL!	2
0	8	7.86	9	10	160	991	0.0849673	10.4	2013-07-28	28	1	YB	2.82843	3.16228	12.6491	0.291492	0	0	5.2915	#NULL!	47
0	8	7.86	9	10	160	991	0.0849673	10.4	2013-07-28	28	1	YB	2.82843	3.16228	12.6491	0.291492	0	0	5.2915	#NULL!	47
0	8	7.86	9	10	160	991	0.0849673	10.4	2013-07-28	28	1	YB	2.82843	3.16228	12.6491	0.291492	0	0	5.2915	#NULL!	47
0	8	7.86	9	10	160	991	0.0849673	10.4	2013-07-28	28	1	YB	2.82843	3.16228	12.6491	0.291492	0	0	5.2915	#NULL!	47
0	8	7.86	9	10	160	991	0.0849673	10.4	2013-07-28	28	1	YB	2.82843	3.16228	12.6491	0.291492	0	0	5.2915	#NULL!	47
0	8	7.86	9	3	65	991	0.0849673	10.4	2013-07-28	28	1	YB	2.82843	1.73205	8.06226	0.291492	0	0	5.2915	#NULL!	27
0	8	7.86	9	3	82	991	0.0849673	10.4	2013-07-28	28	1	YB	2.82843	1.73205	9.05539	0.291492	0	0	5.2915	#NULL!	41
0	8	7.86	9	10	160	991	0.0849673	10.4	2013-07-28	28	1	YB	2.82843	3.16228	12.6491	0.291492	0	0	5.2915	#NULL!	47
0	8	7.86	9	10	160	991	0.0849673	10.4	2013-07-28	28	1	YB	2.82843	3.16228	12.6491	0.291492	0	0	5.2915	#NULL!	47
0	8	7.86	9	10	160	991	0.0849673	10.4	2013-07-28	28	1	YB	2.82843	3.16228	12.6491	0.291492	0	0	5.2915	#NULL!	47
0	8	7.86	9	14	23	991	0.0849673	10.4	2013-07-28	28	1	YB	2.82843	3.74166	4.79583	0.291492	0	0	5.2915	#NULL!	12
0	8	7.86	9	4	18	991	0.0849673	10.4	2013-07-28	28	1	YB	2.82843	2	4.24264	0.291492	0	0	5.2915	#NULL!	10
0	5	4.45	6	1	8	938	0.0294118	4.28	2013-08-02	33	1	SB	2.23607	1	2.82843	0.171499	0	0	5.74456	2	3
0	5	4.45	6	6	24	938	0.0294118	4.28	2013-08-02	33	1	SB	2.23607	2.44949	4.89898	0.171499	0	0	5.74456	2	9
43	7.1	7.95	17.5	3	20	1074	0.101626	10.6	2013-08-03	34	0	BNP	2.66458	1.73205	4.47214	0.318788	6.55744	1	5.83095	1	9
40	7.1	7.95	17.5	4	55	1074	0.101626	10.6	2013-08-03	34	0	BNP	2.66458	2	7.4162	0.318788	6.32456	1	5.83095	1	20
86	8	7.86	9	10	100	991	0.0849673	10.4	2013-08-04	35	1	YB	2.82843	3.16228	10	0.291492	9.27362	0	5.91608	#NULL!	40
17	8	7.86	9	10	100	991	0.0849673	10.4	2013-08-04	35	1	YB	2.82843	3.16228	10	0.291492	4.12311	0	5.91608	#NULL!	40
8	8	7.86	9	8	66	991	0.0849673	10.4	2013-08-04	35	1	YB	2.82843	2.82843	8.12404	0.291492	2.82843	0	5.91608	#NULL!	27
40	5	4.45	6	8	73	938	0.0294118	4.28	2013-08-06	37	1	SB	2.23607	2.82843	8.544	0.171499	6.32456	0	6.08276	2	29
33	5	4.45	6	5	73	938	0.0294118	4.28	2013-08-06	37	1	SB	2.23607	2.23607	8.544	0.171499	5.74456	0	6.08276	2	29
29	5	4.45	6	5	73	938	0.0294118	4.28	2013-08-06	37	1	SB	2.23607	2.23607	8.544	0.171499	5.38516	0	6.08276	2	29
28	5	4.45	6	7	61	938	0.0294118	4.28	2013-08-06	37	1	SB	2.23607	2.64575	7.81025	0.171499	5.2915	0	6.08276	2	24
15	5	4.45	6	7	73	938	0.0294118	4.28	2013-08-06	37	1	SB	2.23607	2.64575	8.544	0.171499	3.87298	0	6.08276	2	29
6	5	4.45	6	6	78	938	0.0294118	4.28	2013-08-06	37	1	SB	2.23607	2.44949	8.83176	0.171499	2.44949	0	6.08276	2	30
6	5	4.45	6	7	95	938	0.0294118	4.28	2013-08-06	37	1	SB	2.23607	2.64575	9.74679	0.171499	2.44949	0	6.08276	2	42
0	5	4.45	6	5	73	938	0.0294118	4.28	2013-08-06	37	1	SB	2.23607	2.23607	8.544	0.171499	0	0	6.08276	2	29
0	5	4.45	6	6	73	938	0.0294118	4.28	2013-08-06	37	1	SB	2.23607	2.44949	8.544	0.171499	0	0	6.08276	2	29
0	5	4.45	6	5	27	938	0.0294118	4.28	2013-08-06	37	1	SB	2.23607	2.23607	5.19615	0.171499	0	0	6.08276	2	11
0	5	4.45	6	8	73	938	0.0294118	4.28	2013-08-06	37	1	SB	2.23607	2.82843	8.544	0.171499	0	0	6.08276	2	29
0	5	4.45	6	7	73	938	0.0294118	4.28	2013-08-06	37	1	SB	2.23607	2.64575	8.544	0.171499	0	0	6.08276	2	29
0	5	4.45	6	7	97	938	0.0294118	4.28	2013-08-06	37	1	SB	2.23607	2.64575	9.84886	0.171499	0	0	6.08276	2	42
2	5	4.45	6	8	138	938	0.0294118	4.28	2013-08-07	38	1	SB	2.23607	2.82843	11.7473	0.171499	1.41421	0	6.16441	2	63
0	5	4.45	6	8	138	938	0.0294118	4.28	2013-08-07	38	1	SB	2.23607	2.82843	11.7473	0.171499	0	0	6.16441	2	63
0	5	4.45	6	4	38	938	0.0294118	4.28	2013-08-07	38	1	SB	2.23607	2	6.16441	0.171499	0	0	6.16441	2	17
0	5	4.45	6	4	38	938	0.0294118	4.28	2013-08-07	38	1	SB	2.23607	2	6.16441	0.171499	0	0	6.16441	2	17
0	5	4.45	6	4	38	938	0.0294118	4.28	2013-08-07	38	1	SB	2.23607	2	6.16441	0.171499	0	0	6.16441	2	17
0	5	4.45	6	4	38	938	0.0294118	4.28	2013-08-07	38	1	SB	2.23607	2	6.16441	0.171499	0	0	6.16441	2	17
